# Supplementary material for: Indian Almond (Terminalia catappa Linn.) Leaf Extract Extends Lifespan by Improving Lipid Metabolism and Antioxidant Activity Dependent on AMPK Signaling Pathway in Caenorhabditis elegans under High-Glucose-Diet Conditions
Source: MDPI journal article supplement (doi:10.3390/antiox13010014), 2023-12-20
Supplement: s1 [file s1]

**Indian almond (*Terminalia catappa* Linn.) leaves extract healthspan by improving lipid metabolism and antioxidant activity dependent on AMPK signaling pathway in *Caenorhabditis elegans* under high-glucose diet conditions**

**Yebin Kim<sup>1</sup>, Seul-bi Lee<sup>1</sup>, Myogyeeong Cho<sup>1</sup>, Soojin Choe<sup>2</sup> and Miran Jang<sup>1, 2\*</sup>**

1 Department of smart food and drug, Inje University, Gimhae 50834, Republic of Korea

2 Department of Food Technology and Nutrition, Inje University, Gimhae 50834, Republic of Korea

\* Correspondence: mrjangl@inje.ac.kr; Tel.: +82-55-320-3234

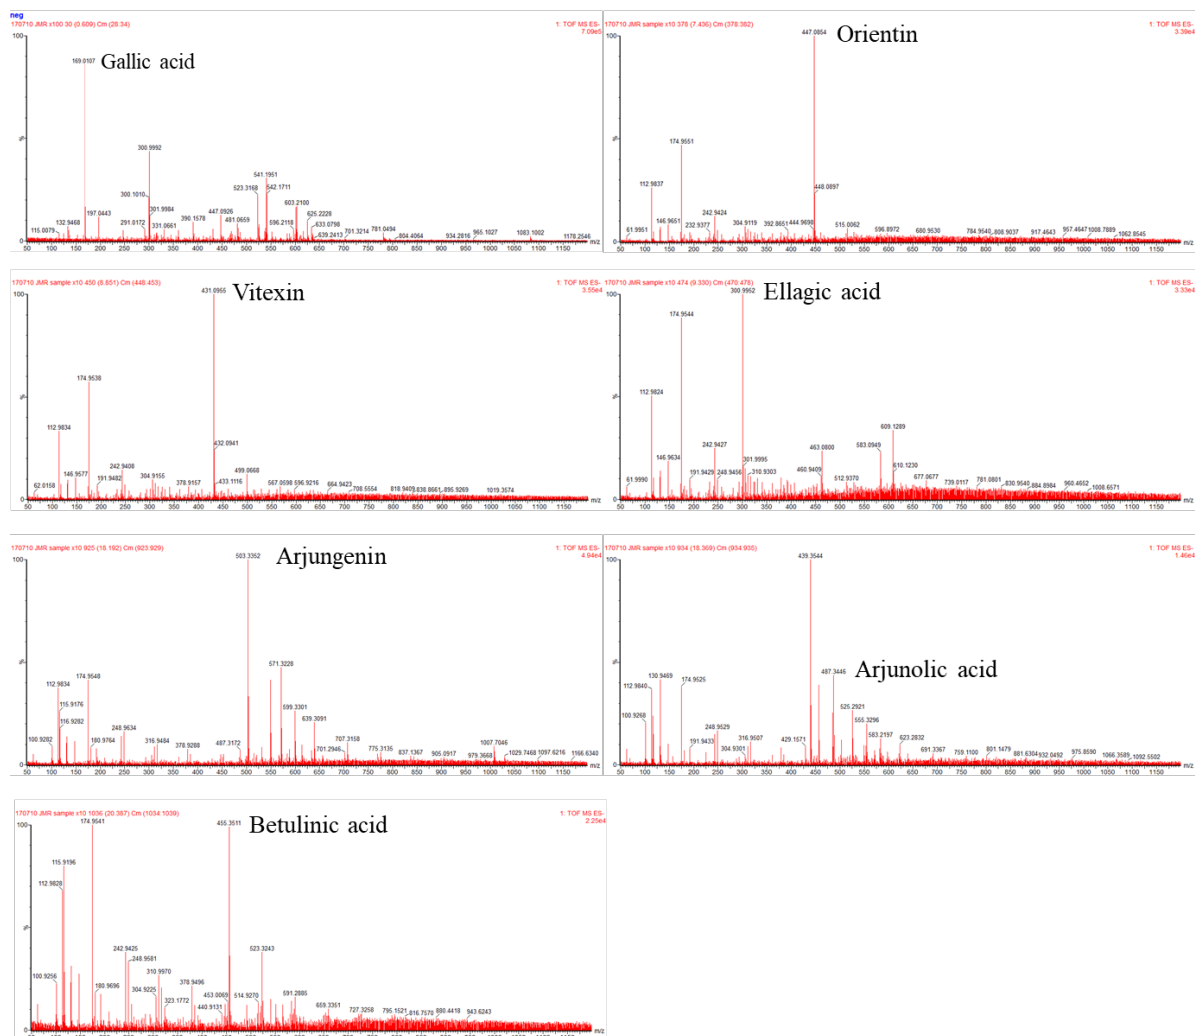

**Figure S1.** UPLC-QTOF-MS fragments of TCE.

**Table S1. Influence of TCE on survival rate in various strains**

| Genotypes            | TCE concentrations<br>( $\mu\text{g/mL}$ ) | Conditions | Mean<br>lifespans <sup>a</sup> | Maximum<br>lifespans <sup>b</sup> | P-value <sup>c</sup> |
|----------------------|--------------------------------------------|------------|--------------------------------|-----------------------------------|----------------------|
| <b>N<sub>2</sub></b> | 0                                          | Normal     | 18.13 $\pm$ 1.22 <sup>e</sup>  |                                   |                      |
|                      | 6.25                                       |            | 23.94 $\pm$ 1.81               |                                   | < 0.05               |
|                      | 12.5                                       |            | 26.80 $\pm$ 1.95               |                                   | < 0.001              |
|                      | 25                                         |            | 22.04 $\pm$ 1.54               |                                   | 0.0520               |
|                      | 0                                          | 2% Glucose | 12.73 $\pm$ 0.46               |                                   |                      |
|                      | 6.25                                       |            | 18.83 $\pm$ 0.85               |                                   | < 0.001              |
|                      | 12.5                                       |            | 17.40 $\pm$ 0.81               |                                   | < 0.001              |
|                      | 25                                         |            | 19.32 $\pm$ 0.69               |                                   | < 0.001              |
| <b>daf-16</b>        | 0                                          | Normal     | 15.64 $\pm$ 0.45               |                                   |                      |
|                      | 6.25                                       |            | 17.47 $\pm$ 0.52               |                                   | < 0.05               |
|                      | 12.5                                       |            | 18.29 $\pm$ 0.84               |                                   | < 0.05               |
|                      | 25                                         |            | 18.52 $\pm$ 1.18               |                                   | < 0.05               |
|                      | 0                                          | 2% Glucose | 17.46 $\pm$ 0.45               |                                   |                      |
|                      | 6.25                                       |            | 18.61 $\pm$ 0.63               |                                   | < 0.05               |
|                      | 12.5                                       |            | 16.02 $\pm$ 0.49               |                                   | 0.1207               |
|                      | 25                                         |            | 18.43 $\pm$ 0.60               |                                   | < 0.05               |
| <b>skn-1</b>         | 0                                          | Normal     | 12.82 $\pm$ 0.41               |                                   |                      |
|                      | 6.25                                       |            | 12.88 $\pm$ 0.38               |                                   | 0.9790               |
|                      | 12.5                                       |            | 13.26 $\pm$ 0.35               |                                   | 0.7669               |
|                      | 25                                         |            | 11.61 $\pm$ 0.44               |                                   | < 0.05               |
|                      | 0                                          | 2% Glucose | 11.04 $\pm$ 0.27               |                                   |                      |
|                      | 6.25                                       |            | 11.21 $\pm$ 0.25               |                                   | 0.6049               |
|                      | 12.5                                       |            | 11.14 $\pm$ 0.33               |                                   | < 0.05               |
|                      | 25                                         |            | 12.36 $\pm$ 0.30               |                                   | < 0.001              |
| <b>aak-1</b>         | 0                                          | Normal     | 16.04 $\pm$ 1.20               |                                   |                      |
|                      | 6.25                                       |            | 21.18 $\pm$ 1.04               |                                   | < 0.001              |
|                      | 12.5                                       |            | 19.22 $\pm$ 1.09               |                                   | 0.1534               |
|                      | 25                                         |            | 17.82 $\pm$ 1.11               |                                   | 0.4360               |
|                      | 0                                          | 2% Glucose | 15.68 $\pm$ 1.19               |                                   |                      |
|                      | 6.25                                       |            | 15.94 $\pm$ 1.19               |                                   | 0.9537               |
|                      | 12.5                                       |            | 16.65 $\pm$ 1.50               |                                   | 0.9844               |
|                      | 25                                         |            | 14.98 $\pm$ 1.63               |                                   | 0.6797               |
| <b>atgl-1</b>        | 0                                          | Normal     | 26.80 $\pm$ 0.86               |                                   |                      |
|                      | 6.25                                       |            | 28.63 $\pm$ 1.06               |                                   | < 0.05               |
|                      | 12.5                                       |            | 29.35 $\pm$ 1.04               |                                   | < 0.01               |
|                      | 25                                         |            | 28.13 $\pm$ 1.24               |                                   | 0.2019               |
|                      | 0                                          | 2% Glucose | 25.09 $\pm$ 1.03               |                                   |                      |
|                      | 6.25                                       |            | 25.58 $\pm$ 1.08               |                                   | 0.9037               |
|                      | 12.5                                       |            | 24.77 $\pm$ 1.28               |                                   | 0.7051               |
|                      | 25                                         |            | 24.49 $\pm$ 1.35               |                                   | 0.4260               |

Worms were treated with TCE from the L4 stage. Survival was recorded every other day until all worms died. The statistically data was generated by the OASIS application ( $p < .05$ ).

a: the mean lifespan was referred to the time when the survival rate dropped to 50%.

b: the maximum lifespan means end points (days) of the lifespan of the worm.

c: P-values were analyzed by log-rank (Mantel-Cox method) tests.

d: days  $\pm$  standard error
